# Supplementary material for: Validation of HER2 status in whole genome sequencing data of breast cancers with AI-driven, ploidy-corrected approach
Source: bioRxiv or medRxiv preprint supplement (doi:10.1101/2021.08.30.21258379), 2021-09-05
Supplement: Supplementary file [file media-2.pdf]

**Supplementary information: Detailed methodologies of Whole Genome Sequencing used by main Genomic Consortia and data heterogeneity.**

**A. WGS methodology details**

|                   | Material                                                         | ASCO/CAP<br>HER2<br>recommendations<br>issue | DNA<br>extraction                | DNA<br>fragmentation     | Insert<br>size | Library<br>preparation                            | Read<br>mode | Sequencing<br>platform    |
|-------------------|------------------------------------------------------------------|----------------------------------------------|----------------------------------|--------------------------|----------------|---------------------------------------------------|--------------|---------------------------|
| HMF <sup>1</sup>  | Biopsy (core needle from metastasis, or LN frozen primary tumor) | 2013/2018                                    | DSP DNA Midi, Qiagen             | Sonication (Covaris)     | 450            | TruSeq Nano LT                                    | 2x150        | HiSeqX/<br>NovaSeq6000    |
|                   | blood                                                            | -                                            | Qiasymphony DSP DNA mini, Qiagen |                          |                |                                                   |              |                           |
| TCGA <sup>2</sup> | Frozen primary tumor                                             | 2007                                         | DNA/RNA Allprep, Qiagen          | Bead Linked Transposomes | 300-350        | Illumina Nextera DNA Flex Library Preparation Kit | 2x150        | NovaSeq6000               |
|                   | blood                                                            | -                                            | DNA Midi, Qiagen                 |                          |                |                                                   |              |                           |
| ICGC <sup>3</sup> | Breast cancer tissue                                             | 2013                                         | NA                               | Sonication (Covaris)     | 500            | TruSeq Nano LT                                    | 2x100        | HiSeq 2000/<br>HiSeq 2500 |
|                   | Blood lymphocytes, skin or breast tissue                         | -                                            | NA                               |                          |                |                                                   |              |                           |

Supplementary Table 1: Differences in DNA preparation, library preparation and sequencing technologies across Genomic Consortia.

Data source:

- 1) Priestley, P., Baber, J., Lolkema, M.P. *et al.* Pan-cancer whole-genome analyses of metastatic solid tumours. *Nature* **575**, 210–216 (2019). <https://doi.org/10.1038/s41586-019-1689-y>
- 2) Rossing, M., Sørensen, C. S., Ejlersen, B., & Nielsen, F. C. (2019). Whole genome sequencing of breast cancer. *APMIS : acta pathologica, microbiologica, et immunologica Scandinavica*, *127*(5), 303–315. <https://doi.org/10.1111/apm.12920>
- 3) Nik-Zainal, S., Davies, H., Staaf, J. *et al.* Landscape of somatic mutations in 560 breast cancer whole-genome sequences. *Nature* **534**, 47–54 (2016). <https://doi.org/10.1038/nature17676>

## B. Coverage heterogeneity of input data

|                          | Average tumour sample coverage (min-max; SD) | Average normal coverage (min-max, SD) |
|--------------------------|----------------------------------------------|---------------------------------------|
| All datasets             | 48,27 (27,20-75,50; 4,,31)                   | 36,03 (25,12-63,47; 5,37)             |
| <b>HMF (downsampled)</b> | 49,08 (40,40-52,67; 1,85)                    | 36,59 (25,12-59,21; 5,25)             |
| ICGC                     | 43,23 (28;23-75,5; 7,69)                     | 35,58 (26,24-63,47; 5,85)             |
| TCGA                     | 48,96 (27,20-59,00; 7,05)                    | 31,24 (26,46-39,95; 2,63)             |

Supplementary Table 2: Coverage heterogeneity across datasets

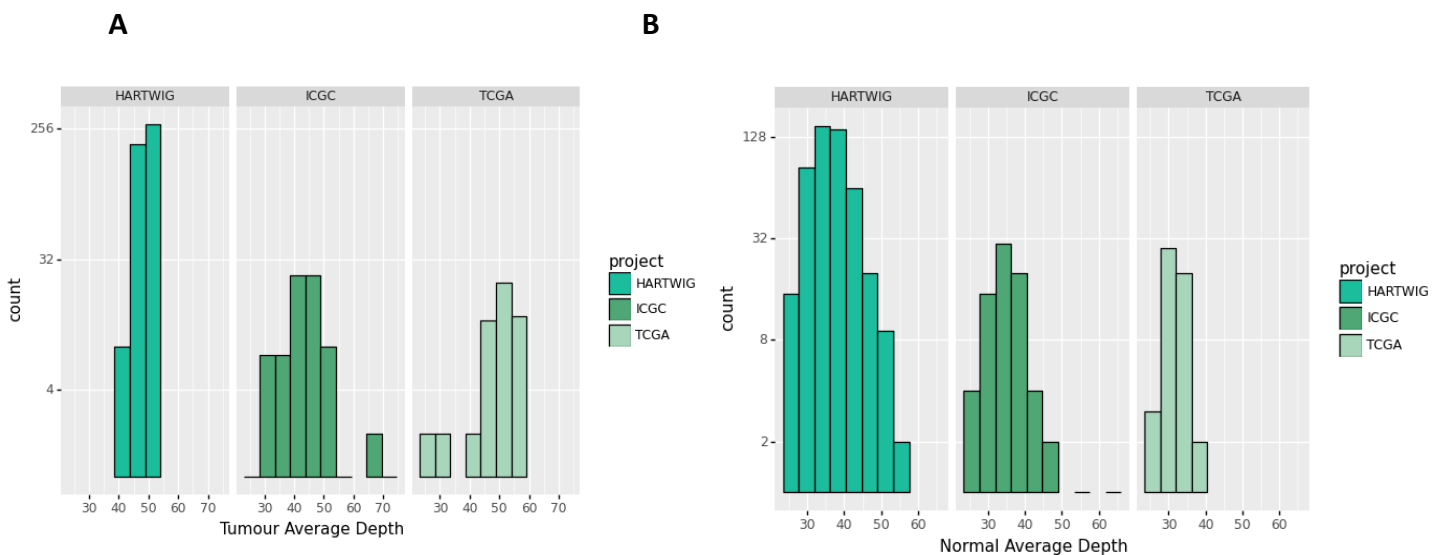

Supplementary Figure 1: Tumour (A) and Normal (B) coverage heterogeneity across Datasets. HMF data were downsampled by the Authors.

**C. Heterogeneity in tumour purity and ploidy across Consortia**

|                      | Average tumour sample purity (min-max; SD) | Average tumour ploidy (min-max, SD) |
|----------------------|--------------------------------------------|-------------------------------------|
| <b>All Consortia</b> | 0,56 (0,2-1; 0,18)                         | 36,03 (1,51-5,54; 5,37)             |
| <b>HMF</b>           | 0,56 (0,2-1; 0,19)                         | 2,84 (1,51-5,54; 0,86)              |
| <b>ICGC</b>          | 0,53 (0,21-1; 0,19)                        | 2,74(; 0,86)                        |
| <b>TCGA</b>          | 0,58 (0,21-0,92)                           | 3,24 (1,79- 5,54; 0,84)             |

Supplementary Table 3: Purity and ploidy heterogeneity across datasets

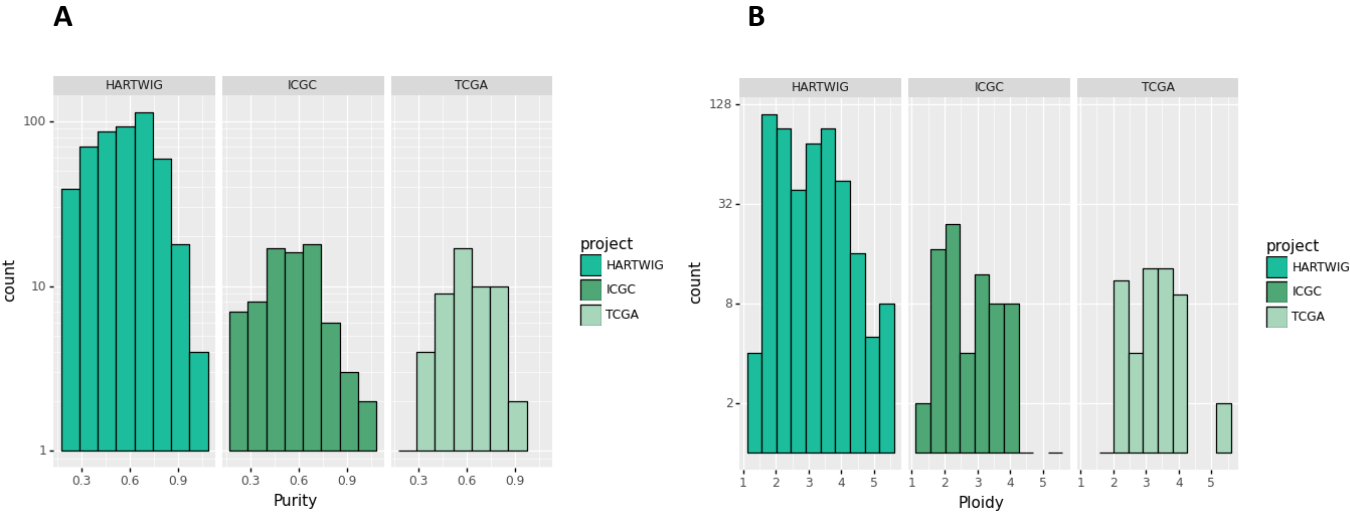

Supplementary Figure 2: Purity (A) and ploidy (B) heterogeneity across Consortia.
